# Supplementary material for: Severe Immune-Related Adverse Events in Patients Treated with Nivolumab for Metastatic Renal Cell Carcinoma Are Associated with PDCD1 Polymorphism
Source: MDPI journal article supplement (doi:10.3390/genes13071204), 2022-07-05
Supplement: s1 [file s1]

**Supplementary Table S1.** Primers and PCR conditions for SNP typing of polymorphic variants of *PDCD1* gene

| Gene         | SNP                  | RS         | primer sequences           | Restriction enzyme | PCR product (bp) | RFLP band pattern (bp) |
|--------------|----------------------|------------|----------------------------|--------------------|------------------|------------------------|
| <i>PDCD1</i> | <i>PD-1.5</i><br>C>T | rs2227981  | 5'-GTGCCTGTGTTCTCTGTGGA-3' | 8 µL               | 212              | C: 212                 |
|              |                      |            | 5'-CCAAGAGCAGTGTCCATCCT-3' | Pvu II, 5U         |                  | T: 156+56              |
|              | <i>PD-1.3</i><br>G>A | rs11568821 | 5'-GCAGCAACCTCAATCCCTAA-3' | 8µL                | 222              | G: 333                 |
|              |                      |            | 5'-AAATGTCCCTGGCATTCTTG-3' | Pst I , 5U         |                  | A: 51+282              |
|              | <i>PD-1.6</i><br>G>A | rs10204525 | 5'- CCTCACACCACTCGGGAGA-3' | 8µL                | 301              | G: 164+137             |
|              |                      |            | 5'-AGTGGGGGTGCAGTGTGT-3'   | Nla III, 5U        |                  | A:301                  |

SNP, single nucleotide polymorphism; *PDCD1*, *Programmed cell death protein 1*; RS, reference single nucleotide polymorphism identification number; RFLP, restriction fragment length polymorphism

**Supplementary Table S2.** Prognostic values of clinical variables and *PDCD1* polymorphism for predicting grade 2 or more irAE and multiple irAEs in 106 patients with metastatic renal cell carcinoma analyzed by using multivaluable logistic regression models

| Factor                                                                                                                                                                     | Risk category          | At least one irAE ≥ G2 |                      |              | Multiple irAEs |                      |              |
|----------------------------------------------------------------------------------------------------------------------------------------------------------------------------|------------------------|------------------------|----------------------|--------------|----------------|----------------------|--------------|
|                                                                                                                                                                            |                        | OR                     | 95% CI               | p            | OR             | 95% CI               | p            |
| Regimen                                                                                                                                                                    | Nivo + Ipi             |                        |                      |              | 1.279          | 0.965 – 13.333       | 0.072        |
| Clinical stage                                                                                                                                                             | 3 ≤                    | 2.183                  | 0.645 – 7.392        | 0.210        |                |                      |              |
| Nephrectomy                                                                                                                                                                | yes                    |                        |                      |              | 0.800          | 0.223 – 2.866        | 0.731        |
| <i>PDCD1</i> SNP                                                                                                                                                           | <i>PD-1.6 G allele</i> | <b>3.712</b>           | <b>1.591 – 8.658</b> | <b>0.002</b> | <b>3.047</b>   | <b>1.151 – 8.065</b> | <b>0.025</b> |
| <i>PDCD1</i> , Programmed cell death protein 1; SNP, single nucleotide polymorphism; irAE, immune-related adverse event; G, grade; OR, odds ratio; CI, confidence interval |                        |                        |                      |              |                |                      |              |
